# Supplementary material
Source: Springer Nature journal article supplement (https://www.springermedizin.de/resource/supplementary/12891_2008_646_MOESM1_ESM.pdf/9506466)

**1. Qualitative Interviews**

(n=13)

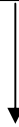

**2. Item selection**

Transcript analysis and items selection  
for draft of Work Instability Scale

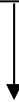

**3. First postal survey**

134 sent with 68 returned

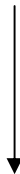

**5. Rasch Analysis**

Final item reduction  
Tests for differential item function

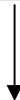

**6. Second postal survey**

Test re-test  
25 at 2 time points

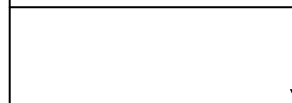

**4. Criterion validity:**

Gold standard vocational assessments  
by Occupational Health  
Physiotherapist/Ergonomist (n=13)

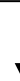

Item discrimination

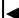

Supplement: MOESM1 [file 9506466]
